# Supplementary material for: Plasma Membrane-Located Purine Nucleotide Transport Proteins Are Key Components for Host Exploitation by Microsporidian Intracellular Parasites
Source: PubMed Central journal article supplement (PMC4256464; doi:10.1371/journal.ppat.1004547), 2014-12-04
Supplement: ppat.1004547.s001.pdf [file ppat.1004547.s001.pdf]

K155 (At)

|         |        |           |       |       |       |         |        |         |         |        |        |         |         |       |         |             |       |       |      |      |      |        |     |       |     |     |     |     |     |     |     |     |     |     |     |     |     |     |     |     |     |     |     |
|---------|--------|-----------|-------|-------|-------|---------|--------|---------|---------|--------|--------|---------|---------|-------|---------|-------------|-------|-------|------|------|------|--------|-----|-------|-----|-----|-----|-----|-----|-----|-----|-----|-----|-----|-----|-----|-----|-----|-----|-----|-----|-----|-----|
|         | 10     | 20        | 30    | 40    | 50    | 60      | 70     | 80      | 90      | 100    | 110    | 120     | 130     | 140   | 150     |             |       |       |      |      |      |        |     |       |     |     |     |     |     |     |     |     |     |     |     |     |     |     |     |     |     |     |     |
| CtrNT1  | MTQTA  | EKPFGLRSL | WPK   | IHMHE | ELKKV | LPMFLMF | FCISFN | YTLRDT  | KDTLIVT | APGSGA | EAIPI  | FKLWLV  | VP      | SAVV  | FMLIYAK | LSNINLNKQAL | FAVLS | PVVVF | FALF | FPV  |      |        |     |       |     |     |     |     |     |     |     |     |     |     |     |     |     |     |     |     |     |     |     |
| CtrNT2  | MSSSEV | KFSKFRGYF | FP    | IYRS  | EFSKF | IPLFFLA | FFVGVN | YALLKTT | KDSLVLV | GSRAGA | EIVPI  | FLKVVGI | VP      | GAVI  | VTMIYGM | SRYSRGT     | VFISL | VGGF  | LGF  | FALF | FATV |        |     |       |     |     |     |     |     |     |     |     |     |     |     |     |     |     |     |     |     |     |     |
| PamNT1  | MSQDA  | KQDFGKWR  | AFP   | WHY   | ELKKV | LPMFMM  | FFISFN | YTLRDT  | KDTLIVT | SAGA   | EAIPI  | FLKSVGI | VP      | AAIL  | FMIYAK  | LSNTLSREN   | EYVTL | LP    | FIF  | FFGL | FVFM |        |     |       |     |     |     |     |     |     |     |     |     |     |     |     |     |     |     |     |     |     |     |
| PamNT2  | SQQA   | SFGKLR    | AFP   | IHG   | EYKKV | LPMLML  | FLICFN | YTLRNV  | KDAIVVT | AKASGA | EIVPI  | FLKVVWL | LP      | AVLFT | LIFTK   | LSNRFSQEK   | EVYI  | VI    | ST   | FLL  | FFGS | FSTYIF |     |       |     |     |     |     |     |     |     |     |     |     |     |     |     |     |     |     |     |     |     |
| PamNT3  | MSQTP  | TGSRE     | SPWR  | SNL   | WHY   | ELKKV   | IPMLLI | FFISFD  | YTLRDK  | LSLIT  | AKSSGA | EIVPI   | FVKVWAM | FP    | GAILMT  | LFTWLS      | NSR   | LSRE  | IV   | EY   | FLIT | SLF    | SFY | FFIFT | FIL |     |     |     |     |     |     |     |     |     |     |     |     |     |     |     |     |     |     |
| PamNT4  | MSKTN  | NEFGK     | VRSIL | WPK   | IQA   | E       | WYAV   | FLSFI   | YFCV    | LAAYV  | IRPIR  | DQMAVE  | VP      | ST    | ELVP    | ---         | ---   | ---   | ---  | ---  | ---  | ---    | --- | ---   | --- |     |     |     |     |     |     |     |     |     |     |     |     |     |     |     |     |     |     |
| PamNT5  | MKNQ   | NSV       | SSTL  | WPK   | L     | ILK     | KL     | SL      | IL      | LFQ    | FLI    | I       | VY      | HT    | LK      | D           | K     | D     | T    | IV   | IT   | AS     | D   | A     | G   | A   | E   | I   | P   |     |     |     |     |     |     |     |     |     |     |     |     |     |     |
| SnegNT1 | MSQ    | SQ        | NE    | FGK   | VRSIL | WPK     | IHG    | F       | EL      | KKL    | VP     | MVLL    | FL      | IL    | FN      | Y           | T     | LR    | D    | T    | LV   | IT     | AP  | G     | G   | A   | E   | I   | P   |     |     |     |     |     |     |     |     |     |     |     |     |     |     |
| SnegNT2 | MST    | QT        | DV    | S     | K     | WR      | SFL    | WPK     | IQR     | E      | IK     | KF      | LP      | LL    | LI      | Y           | AL    | CL    | NY   | S    | L    | K      | V   | A     | K   | D   | T   | LV  | IT  | AP  | G   | G   | A   | E   | I   | P   |     |     |     |     |     |     |     |
| SnegNT3 | MS     | ST        | E     | Y     | K     | ST      | WTQ    | WPK     | IRR     | F      | EL     | KKV     | LP      | LL    | LI      | L           | K     | FL    | V    | S    | M    | Y      | AT  | L     | K   | T   | LV  | IT  | AP  | G   | G   | A   | E   | I   | P   |     |     |     |     |     |     |     |     |
| SnegNT4 | ML     | R         | K     | K     | F     | A       | S      | L       | K       | S      | E      | L       | LS      | Y     | S       | A           | V     | E     | R    | L    | I    | V      | --- | ---   | --- | --- | --- | --- | --- | --- | --- | --- | --- | --- | --- | --- | --- | --- | --- | --- |     |     |     |
| RickNT1 | MT     | I         | N     | P     | S     | N       | I      | E       | N       | S      | S      | K       | I       | N     | S       | F           | S     | K     | L    | T    | D    | Y      | I   | ---   | --- | --- | --- | --- | --- | --- | --- | --- | --- | --- | --- | --- | --- | --- | --- | --- | --- |     |     |
| RickNT2 | MNT    | P         | K     | ---   | ND    | N       | L      | S       | E       | L      | S      | K       | V       | I     | ---     | ---         | ---   | ---   | ---  | ---  | ---  | ---    | --- | ---   | --- | --- | --- | --- | --- | --- | --- | --- | --- | --- | --- | --- | --- | --- | --- | --- | --- |     |     |
| RickNT3 | MDS    | V         | D     | S     | N     | C       | T      | I       | W       | N      | K      | A       | R       | N     | S       | K           | F     | R     | D    | I    | V    | ---    | --- | ---   | --- | --- | --- | --- | --- | --- | --- | --- | --- | --- | --- | --- | --- | --- | --- | --- | --- |     |     |
| RickNT4 | ML     | P         | P     | K     | ---   | I       | F      | F       | E       | K      | V      | K       | E       | I     | ---     | ---         | ---   | ---   | ---  | ---  | ---  | ---    | --- | ---   | --- | --- | --- | --- | --- | --- | --- | --- | --- | --- | --- | --- | --- | --- | --- | --- | --- |     |     |
| CcarNT1 | MEN    | S         | Q     | ---   | K     | S       | F      | T       | A       | E      | L      | R       | R       | V     | ---     | ---         | ---   | ---   | ---  | ---  | ---  | ---    | --- | ---   | --- | --- | --- | --- | --- | --- | --- | --- | --- | --- | --- | --- | --- | --- | --- | --- | --- |     |     |
| LasNT1  | MA     | H         | N     | Q     | ---   | K       | I      | L       | S       | V      | L      | ---     | ---     | ---   | ---     | ---         | ---   | ---   | ---  | ---  | ---  | ---    | --- | ---   | --- | --- | --- | --- | --- | --- | --- | --- | --- | --- | --- | --- | --- | --- | --- | --- | --- |     |     |
| LintNT1 | MS     | D         | K     | G     | K     | T       | G      | S       | M       | P      | E      | E       | D       | T     | G       | W           | R     | A     | I    | L    | ---  | ---    | --- | ---   | --- | --- | --- | --- | --- | --- | --- | --- | --- | --- | --- | --- | --- | --- | --- | --- | --- |     |     |
| EcumNT2 | MSE    | I         | G     | S     | V     | P       | V      | N       | E       | N      | R      | P       | L       | L     | T       | E           | D     | E     | V    | E    | A    | Q      | --- | ---   | --- | --- | --- | --- | --- | --- | --- | --- | --- | --- | --- | --- | --- | --- | --- | --- | --- | --- |     |
| EcumNT3 | MST    | F         | L     | S     | A     | S       | S      | K       | S       | Y      | L      | R       | T       | E     | E       | E           | E     | E     | V    | ---  | ---  | ---    | --- | ---   | --- | --- | --- | --- | --- | --- | --- | --- | --- | --- | --- | --- | --- | --- | --- | --- | --- | --- |     |
| EcumNT4 | MNE    | V         | E     | N     | N     | H       | S      | F       | P       | R      | E      | D       | I       | P     | T       | E           | D     | E     | I    | E    | E    | A      | --- | ---   | --- | --- | --- | --- | --- | --- | --- | --- | --- | --- | --- | --- | --- | --- | --- | --- | --- | --- |     |
| ThomNT1 | MSE    | N         | R     | E     | I     | D       | A      | T       | D       | R      | R      | D       | K       | T     | F       | O           | K     | E     | K    | L    | R    | P      | H   | V     | --- | --- | --- | --- | --- | --- | --- | --- | --- | --- | --- | --- | --- | --- | --- | --- | --- | --- | --- |
| ThomNT2 | MK     | R         | I     | H     | M     | A       | K      | P       | G       | T      | F      | D       | S       | F     | S       | I           | K     | K     | Y    | L    | N    | R      | E   | L     | R   | D   | M   | R   | E   | E   | A   | S   | E   | G   | A   | S   | L   | N   | S   | I   | S   |     |     |
| ThomNT3 | MN     | V         | R     | D     | S     | E       | A      | N       | N       | P      | L      | S       | A       | E     | E       | I           | E     | Q     | I    | A    | ---  | ---    | --- | ---   | --- | --- | --- | --- | --- | --- | --- | --- | --- | --- | --- | --- | --- | --- | --- | --- | --- | --- |     |
| ThomNT4 | MP     | N         | Q     | N     | D     | L       | A      | H       | E       | I      | R      | T       | L       | T     | E       | N           | E     | V     | E    | Q    | A    | ---    | --- | ---   | --- | --- | --- | --- | --- | --- | --- | --- | --- | --- | --- | --- | --- | --- | --- | --- | --- |     |     |

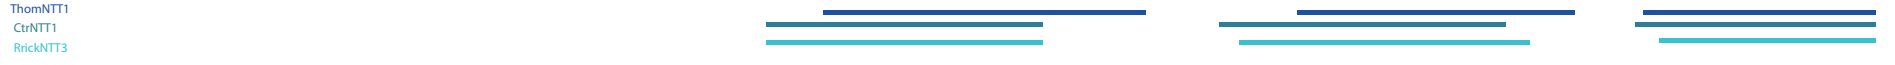

E245 (At)

|         |       |      |      |       |      |      |     |     |     |     |     |     |     |     |     |     |   |
|---------|-------|------|------|-------|------|------|-----|-----|-----|-----|-----|-----|-----|-----|-----|-----|---|
|         | 160   | 170  | 180  | 190   | 200  | 210  | 220 | 230 | 240 | 250 | 260 | 270 | 280 | 290 | 300 | 310 |   |
| CtrNT1  | YPCRH | IHLH | PTAF | ADTLQ | SILP | SGFM | GF  | --- | --- | --- | --- | --- | --- | --- | --- | --- |   |
| CtrNT2  | YPI   | GDA  | LH   | L     | N    | K    | L   | A   | A   | K   | L   | Q   | S   | I   | L   | P   | P |
| PamNT1  | YPAR  | E    | V    | L     | M    | P    | H   | A   | S   | A   | E   | A   | L   | K   | A   | Y   | L |
| PamNT2  | YPL   | R    | D    | V     | L    | H    | P   | H   | O   | L   | C   | D   | Y   | L   | E   | T   | I |
| PamNT3  | YPI   | R    | D    | I     | H    | P    | H   | A   | T   | A   | D   | Y   | L   | E   | T   | I   | L |
| PamNT4  | FLN   | K    | N    | L     | L    | S    | P   | --- | --- | --- | --- | --- | --- | --- | --- | --- |   |
| PamNT5  | YPR   | F    | R    | K     | F    | F    | Y   | L   | E   | N   | V   | A   | D   | Y   | L   | H   |   |
| SnegNT1 | YPAR  | D    | Y    | L     | H    | P    | N   | A   | L   | C   | D   | T   | L   | Q   | N   | T   |   |
| SnegNT2 | YPL   | R    | D    | F     | L    | H    | P   | H   | D   | T   | A   | D   | K   | L   | Q   | A   |   |
| SnegNT3 | YPM   | G    | I    | L     | T    | P    | S   | D   | S   | A   | N   | L   | L   | T   | A   | K   |   |
| SnegNT4 | GK    | I    | P    | ---   | ---  | ---  | --- | --- | --- | --- | --- | --- | --- | --- | --- |     |   |
| RickNT1 | YPN   | I    | H    | I     | F    | H    | V   | P   | D   | N   | L   | A   | D   | W   | M   |     |   |
| RickNT2 | FPN   | H    | E    | M     | L    | H    | F   | S   | P   | A   | T   | V   | Q   | N   | L   |     |   |
| RickNT3 | YYP   | P    | D    | L     | V    | H    | P   | D   | E   | T   | I   | E   | S   | W   | S   |     |   |
| RickNT4 | FPY   | R    | D    | F     | H    | P    | D   | P   | E   | L   | I   | K   | H   | I   | T   |     |   |
| RickNT5 | YPN   | Q    | I    | Y     | H    | P    | N   | D   | E   | M   | I   | N   | K   | L   | I   |     |   |
| CcarNT1 | YYP   | P    | F    | F     | H    | P    | N   | H   | Q   | T   | I   | E   | G   | L   | Y   |     |   |
| LasNT1  | YYP   | R    | D    | F     | L    | H    | P   | S   | P   | E   | I   | R   | A   | L   | A   |     |   |
| LintNT1 | YPL   | T    | E    | Y     | H    | M    | S   | Y   | E   | T   | I   | S   | H   | L   | Q   |     |   |
| EcumNT2 | YPL   | F    | A    | E     | K    | I    | Q   | P   | G   | L   | Y   | F   | S   | R   | D   |     |   |
| EcumNT3 | W     | L    | K    | G     | I    | Q    | K   | D   | F   | Y   | S   | R   | D   | I   | F   |     |   |
| EcumNT4 | W     | P    | Y    | C     | K    | R    | L   | O   | P   | D   | F   | F   | S   | R   | D   |     |   |
| ThomNT1 | I     | Y    | F    | K     | R    | L    | D   | N   | E   | F   | L   | V   | A   | D   | I   |     |   |
| ThomNT2 | L     | P    | L    | R     | E    | I    | E   | P   | S   | K   | F   | I   | T   | I   | D   |     |   |
| ThomNT3 | L     | P    | L    | Q     | D    | T    | I   | E   | S   | S   | N   | F   | I   | N   | A   |     |   |
| ThomNT4 | L     | H    | E    | V     | A    | S    | E   | V   | G   | T   | M   | L   | S   | L   |     |     |   |

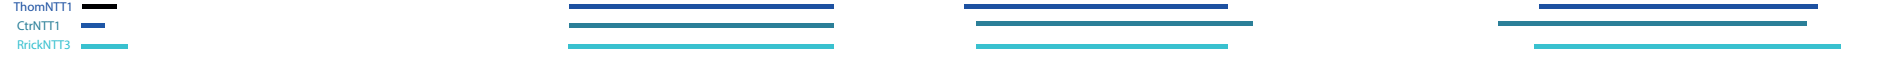

E 385 (At)

Multiple sequence alignment of E 385 (At) protein across various species including CtrNTT1, PamNTT1, and ThomNTT1. The alignment shows conserved regions with a green highlight at the E 385 site. Residue numbers 320-460 are indicated above the alignment.

K527 (At)

Multiple sequence alignment of K527 (At) protein across various species including CtrNTT1, PamNTT1, and ThomNTT1. The alignment shows conserved regions with a green highlight at the K527 site. Residue numbers 470-620 are indicated above the alignment.

ThomNTT1
CtrNTT1
RickNTT3
