# Supplementary material for: Plasma Membrane-Located Purine Nucleotide Transport Proteins Are Key Components for Host Exploitation by Microsporidian Intracellular Parasites
Source: PubMed Central journal article supplement (PMC4256464; doi:10.1371/journal.ppat.1004547), 2014-12-04

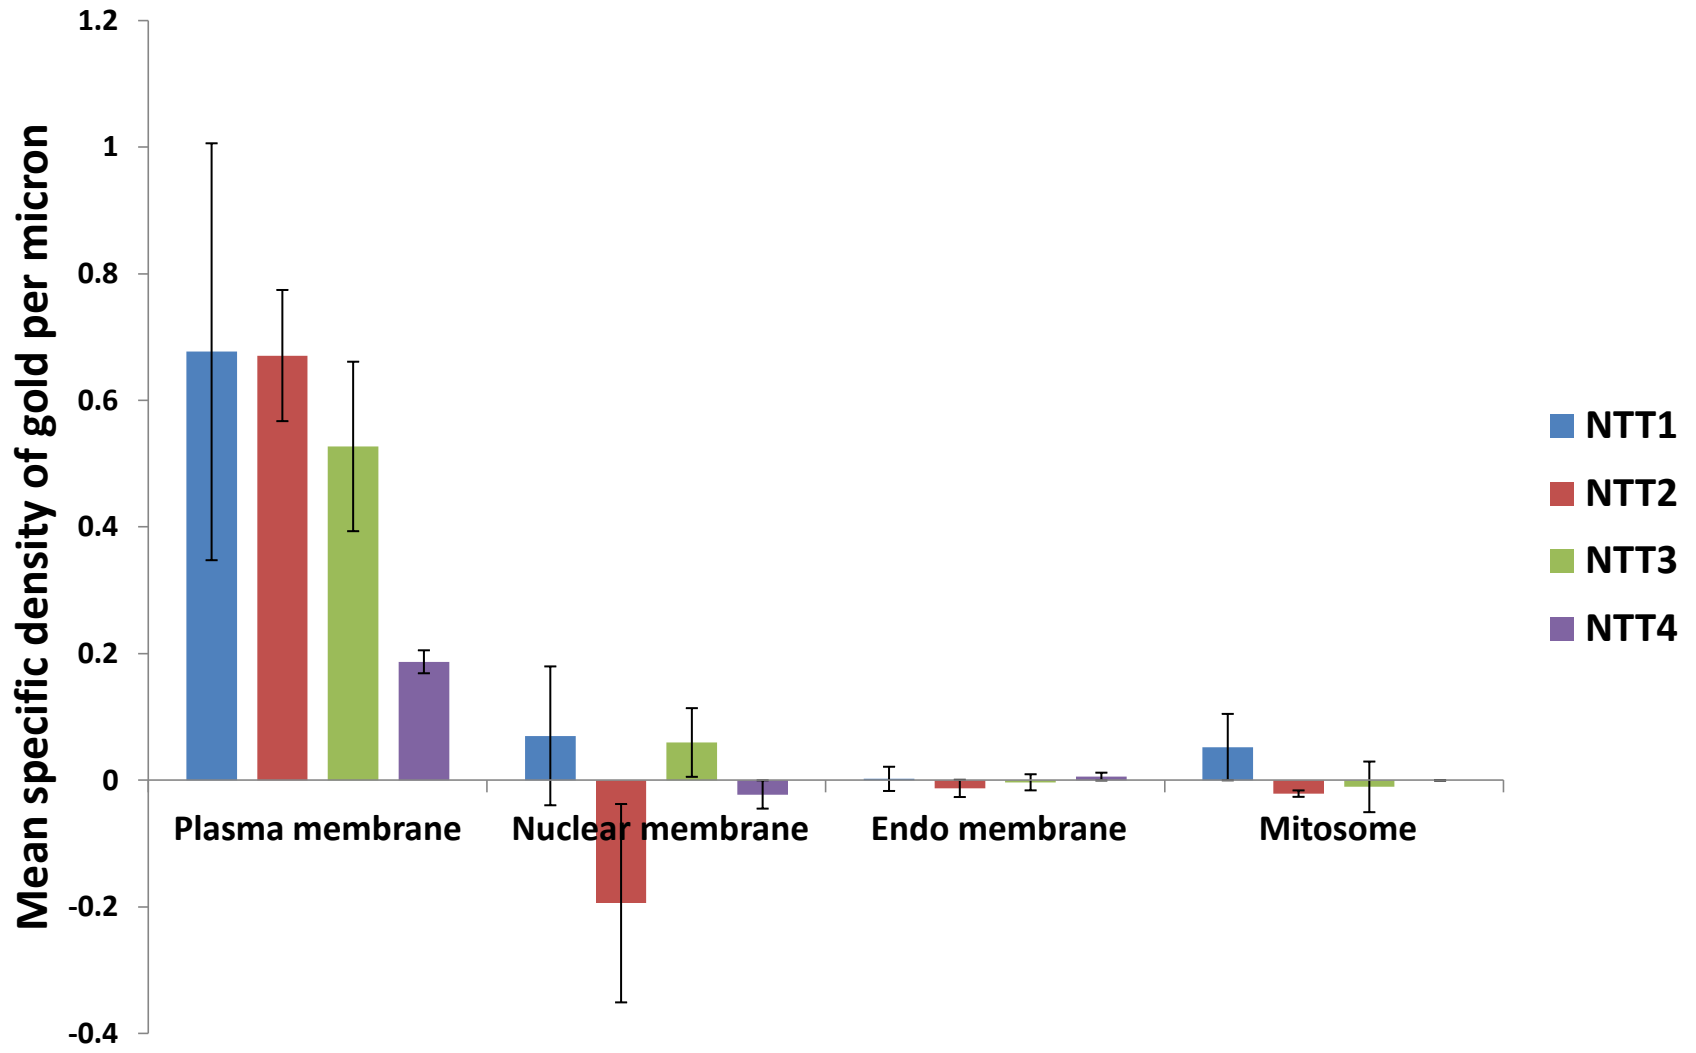

Supplement: ppat.1004547.s002.pdf [file ppat.1004547.s002.pdf]
